# Supplementary material for: Evolutionary dissection of monkeypox virus: Positive Darwinian selection drives the adaptation of virus–host interaction proteins
Source: Front Cell Infect Microbiol. 2023 Jan 13;12:1083234. doi: 10.3389/fcimb.2022.1083234 (PMC9880225; doi:10.3389/fcimb.2022.1083234)
Supplement: Supplementary file 2 [file Table_1.xlsx]

## Sheet: Sheet1
Gene product	Gene name	Function based on NCBI annonation	Gene name based on Vaccinia virus nominature	Gene sequence length	Allelic profiles from about 1500 isolates	Recombination	LRT P value (M0 Vs. M3)	LRT P value (M1a Vs. M2a)	LRT P value (M7 Vs. M8)	dN/dS w0(M0)	Comments
MPXVgp001	J1L	C23L; most abundantsecreted protein; CC-chemokine binding	C23L	741	17	N	0.415771	0.323361	0.286973	0.32136
MPXVgp002	J2L	TNF receptor (CrmB) (Cop-C22L); J2L	C22L	1050	30	N	1	0.998156	0.997024	0.54215
MPXVgp003	J3L	Ankyrin (Cop-C19L); J3L	C19L	1767	23	N	1	0.999361	0.998977	0.5446
MPXVgp004	D1L	Ankyrin/Host Range	N/A	1314	15	N	0.05312	0.0275005	0.0202669	0.74079
MPXVgp006	D3R	Secreted EGF-like protein (Cop-C11R); D3R,secreted growth factor	C11R	428	8	N	0.167594	0.330652	0.118124	0.13942
MPXVgp008	D5R	Zinc finger-like protein; D5R; zinc binding;virosome localization; virulence factor; inhibition of apoptosis induced by UV irradiation"	N/A	729	8	N	1	1	0.998908	0.96195
MPXVgp009	D6L	Soluble IL-18 binding protein (Bsh-D7L); D6L; secreted IL-18 binding protein	N/A	381	18	N	0.409451	0.181988	0.193411	0.57725
MPXVgp010	D7L	Ankyrin/Host Range	N/A	1983	17	N	0.0340388	0.0109297	0.0108955	0.96227
MPXVgp012	D9L	Ankyrin; Type I IFN resistance (Cop-C9L); D9L;similar to Vaccinia virus strain Copenhagen C9L;ankyrin-like	C9L	1893	22	N	0.0285253	0.00852326	0.144727	0.76806
MPXVgp013	D10L	Type 1 IFN inhibitor (Cop-C7L); D10L; similar to Vaccinia virus strain Copenhagen C7L; host range"	C7L	453	13	N	0.832828	0.728731	0.656649	0.61172
MPXVgp014	D11L	Bcl-2-like protein, IFN-beta inhibitor (Cop-C6L);D11L; similar to Vaccinia virus strain Copenhagen C6L	C6L	477	16	N	0.0383741	0.0935973	0.0815938	0.31554
MPXVgp015	D12L	Kelch-like protein (Cop-C5L); D12L; similar toVaccinia virus strain Copenhagen C5L; BTB domain of kelch-like protein	C5L	621	9	N	1	0.564699	0.564699	2.77453
MPXVgp016	D13L	IL-1 receptor antagonist (Cop-C10L); D13L; similaR to Vaccinia virus strain Copenhagen C4L	C4L	951	7	N	1	0.569146	0.569147	2.75675
MPXVgp021	D18L	POZ/BTB Kelch domain protein (Cop-C2L); kelch-like fragment; D18L	C2L	339	9	N	1	0.999716	0.999716	1.01938
MPXVgp022	D19L	Putative TLR signalling inhibitor (Cop-C1L); D19L; similar to Vaccinia virus strain Copenhagen C1L	C1L	645	9	N	1	0.999978	0.999819	0.29331
MPXVgp023	P1L	Anti-apoptotic Bcl-2-like protein (Cop-N1L); P1L;similar to Vaccinia virus strain Copenhagen N1L; secreted virulence factor	N1L	354	6	N	0.999961	1	0.999998	0.5238
MPXVgp024	P2L	Alpha amanatin target protein (Cop-N2L); P2L;similar to Vaccinia virus strain Copenhagen N2L	N2L	534	15	N	0.401987	0.101613	0.0987146	1.63134
MPXVgp025	O1L	ANK-containing protein; apoptosis inihibitor(Cop-M1L); O1L; similar to Vaccinia virus strain Copenhagen M1L; ankyrin-like	M1L	1341	18	N	1	0.999469	0.999629	0.72143
MPXVgp026	O2L	NFkB inhibitor (Cop-M2L); O2L; similar to Vaccinia virus strain Copenhagen M2L	M2L	663	13	N	1	0.999973	0.999843	0.51404
MPXVgp027	C1L	Ankyrin/NFkB inhibitor (Cop-K1L); C1L; similar to Vaccinia virus strain Copenhagen K1L; host range;ankyrin-like	K1L	855	15	N	1	0.999743	1	0.4935
MPXVgp028	C2L	Serpin 1,2,3 (Cop-K2L); SPI-3; C2L; similar to Vaccinia virus strain Copenhagen K2L; serine protease inhibitor-like, SPI-3; inhibition of the ability of infected cells to fuse	K2L	1128	17	N	1	0.999973	0.999179	0.45635
MPXVgp030	C4L	Phospholipase-D-like protein (Cop-K4L); C4L;similar to Vaccinia virus strain Copenhagen K4L; phospholipase D-like	K4L	1275	7	N	1	0.813428	0.813428	1.909
MPXVgp031	C5L	Monoglyceride lipase (Cop-K5L); C5L;lysophospholipase-like	K5L	831	18	N	0.129121	0.235047	0.207343	0.33953
MPXVgp032	C6R	Host immune response repressor (Cop-K7R); C6R;similar to Vaccinia virus strain Copenhagen K7R; VAC B15R-like	K7R	450	9	N	1	0.999957	0.999885	0.29331
MPXVgp033	C7L	Caspase-9 (apoptosis) inhibitor (mitochondrial- associated) (Cop-F1L); C7L; similar to Vaccinia virus strain Copenhagen F1L	F1L	1108	12	N	1	0.843388	0.843494	1.55019
MPXVgp034	C8L	dUTPase (Cop-F2L); C8L; similar to Vaccinia virus strain Copenhagen F2L; deoxyuridine triphosphatase	F2L	456	6	N	1	0.98404	0.982374	0.27658
MPXVgp035	C9L	Kelch-like protein (Cop-F3L); C9L; similar to Vaccinia virus strain Copenhagen F3L; kelch-like	F3L	1488	6	N	1	0.999999	0.999995	0.25761
MPXVgp036	C10L	Ribonucleotide reductase small subunit (Cop-F4L);C10L; similar to Vaccinia virus strain Copenhagen F4L; ribonucleotide reductase, small subunit, R2	F4L	960	9	N	0.999997	0.999708	0.999748	0.0001
MPXVgp037^	C11L	36kDa major membrane protein (Cop-F5L); C11L;similar to Vaccinia virus strain Copenhagen F5L	F5L	1032	8	N	0.999997	0.999708	0.999748	0.46089	Twenty alleles have early termination mostly at the codon 15 and encode very truncated proteins (14 aa.) ,these alleles were removed.
MPXVgp041	C15L	S-S bond formation pathway protein substrate(Cop-F9L); C15L; similar to Vaccinia virus strain Copenhagen F9L	F9L	639	13	N	0.999999	1	0.999999	0.27846
MPXVgp042	C16L	Essential Ser/Thr kinase morph (Cop-F10L); C16L;similar to Vaccinia virus strain Copenhagen F10L; serine	F10L	1320	10	N	1	0.999972	0.999739	0.29336
MPXVgp043	C17L	RhoA signalling inhibitor, virus release protein (Cop-F11L); C17L; similar to Vaccinia virus strain Copenhagen F11L	F11L	1065	16	N	1	0.999814	0.999678	0.61151
MPXVgp044	C18L	EEV maturation protein (Cop-F12L); C18L; similar to Vaccinia virus strain Copenhagen F12L; actin tail formation	F12L	1908	20	N	0.00659922	0.00277006	0.0458864	0.62125
MPXVgp045	C19L	Palmitylated EEV membrane glycoprotein (Cop-F13 L);C19L; similar to Vaccinia virus strain Copenhagen F13L; major envelope antigen of EEV; wrapping of IMV to form IEV; phospholipase D-like	F13L	1119	22	N	0.216377	0.444847	0.240859	0.13498
MPXVgp047	C21L	Unknown conserved protein (Cop-F15L); C21L; similar to Vaccinia virus strain Copenhagen F15L	F15L	477	7	N	1	0.999998	0.999952	0.3332
MPXVgp048	C22L	Non-functional Serine Recombinase (Cop-F16L); C22L;similar to Vaccinia virus strain Copenhagen F16L	F16L	696	6	N	1	0.994003	0.999972	0.25613
MPXVgp049	C23R	NA-binding phosphoprotein (VP11); mTOR antagonist(Cop-F17R); C23R; similar to Vaccinia virus strain Copenhagen F17R; virion core DNA-binding phosphoprotein	F17R	1002	5	N	1	0.999999	0.999999	0.3281
MPXVgp050	F1L	Poly (A) polymerase catalytic subunit (VP55)(Cop-E1L); F1L; similar to Vaccinia virus strain Copenhagen E1L; poly-A polymerase, catalytic subunit	E1L	1440	18	N	1	0.999979	0.999981	0.09921
MPXVgp051	F2L	IEV morphogenesis (Cop-E2L); F2L; similar to Vaccinia virus strain Copenhagen E2L	E2L	2213	19	N	0.47446	0.649334	0.454746	0.22001
MPXVgp052	F3L	dsRNA-binding protein, IFN resistance/PKR inhibitor(Z-DNA binding) (Cop-E3L); F3L; similar to Vaccinia virus strain Copenhagen E3L; interferon resistance factor; two forms (25 kDa and 19 kDa) of the dsRNA-binding protein;inhibition of dsRNA-dependent protein kinase and2-5A-synthet	E3L	461	20	N	1	0.999993	0.999995	0.31981
MPXVgp053	F4L	RNA polymerase subunit (RPO30) (Cop-E4L); F4L;similar to Vaccinia virus strain Copenhagen E4L; RNA polymerase 30 kDa subunit; simultaneously intermediate stage promoter-specific transcription factor, VITF-1	E4L	780	11	N	1	0.999997	0.999993	0.1474
MPXVgp054	F5R	Virion protein (Cop-E6R); F5R; similar to Vaccinia virus strain Copenhagen E6R	E6R	1704	13	N	1	0.99983	0.999691	0.10357
MPXVgp055	F6R	yristylated protein (Cop-E7R); F6R; similar to Vaccinia virus strain Copenhagen E7R; soluble myristylated protein	E7R	501	8	N	1	1	0.999905	0.4822
MPXVgp056	F7R	ER-localized membrane protein, virion core protein(Cop-E8R); F7R; similar to Vaccinia virus strain Copenhagen E8R	E8R	822	10	N	1	0.999983	0.999514	0.31665
MPXVgp057	F8L	DNA polymerase (Cop-E9L); F8L; similar to Vaccinia virus strain Copenhagen E9L; DNA polymerase, catalytic subunit	E9L	3021	36	N	0.999999	0.998258	0.999704	0.41752
MPXVgp059$	F10L	Virion core protein (Cop-E11L); F10L; similar to Vaccinia virus strain Copenhagen E11L; virion core protein	E11L	390	3	N	N/A	N/A	N/A	0.26516	Only 3 alleles were fond and dN, dS were calculated using MEGAX,dN=0.002187, dS=0.008248
MPXVgp060	Q1L	Membrane protein (Cop-O1L); Q1L; similar to Vaccinia virus strain Copenhagen O1L	O1L	1998	25	N	1	0.999999	0.999393	0.56979
MPXVgp061	Q2L	Glutaredoxin 1 (Cop-O2L); Q2L; similar to Vaccinia virus strain Copenhagen O2L; virion-associated glutaredoxin	O2L	327	5	N	1	0.998337	1	0.8267
MPXVgp062	I1L	DNA-binding core protein (Cop-I1L); I1L; similar to Vaccinia virus strain Copenhagen I1L; virosomal protein essential for virus multiplication	I1L	938	15	N	1	0.99988	0.9999	0.09412
MPXVgp064	I3L	sDNA-binding phosphoprotein (Cop-I3L); I3L;similar to Vaccinia virus strain Copenhagen I3L; virosomal ssDNA-binding phosphoprotein; interacts with R2 subunit oF ribonucleotide reductase	I3L	810	9	N	1	0.991313	0.999276	0.39427
MPXVgp065	I4L	Ribonucleotide reductase large subunit (Cop-I4L);I4L; similar to Vaccinia virus strain Copenhagen I4L; ribonucleotide reductase, large subunit, R1	I4L	2315	18	N	1	0.999342	0.999157	0.33694
MPXVgp067	I6L	Telomere-binding protein (Cop-I6L); I6L; similar to Vaccinia virus strain Copenhagen I6L	I6L	1149	12	N	1	0.999991	0.999784	0.09623
MPXVgp068	I7L	Virion core cysteine protease (Cop-I7L); I7L;similar to Vaccinia virus strain Copenhagen I7L; virion core protein; similar to DNA topoisomerase II	I7L	1272	13	N	1	0.999995	0.976682	0.18951
MPXVgp069	I8R	NA helicase, DExH-NPH-II domain (Cop-I8R); I8R; similar to Vaccinia virus strain Copenhagen I8R; nucleoside triphosphate phosphohydrolase II, NPH-II; DNA and RNA helicase	I8R	2031	17	N	1	0.999814	0.999897	0.19874
MPXVgp070	G1L	etalloprotease (Cop-G1L); G1L; similar to Vaccinia virus strain Copenhagen G1L; proteinase	G1L	1786	16	N	0.409475	0.176035	0.175855	0.82846
MPXVgp071	G2L	Entry/fusion complex component (Cop-G3L); G2L; similar to Vaccinia virus strain Copenhagen G3L	G3L	336	4	N	0.999978	0.999914	0.999914	0.0001
MPXVgp072	G3R	VLTF (late transcription elongation factor)(Cop-G2R); G3R; similar to Vaccinia virus strain Copenhagen G2R	G2R	999	6	N	0.8579	0.980667	0.515568	0.25393
MPXVgp073	G4L	Glutaredoxin-like protein (Cop-G4L); G4L; similarto Vaccinia virus strain Copenhagen G4L; virion-associated glutaredoxin	G4L	375	8	N	1	0.999998	0.999997	0.27997
MPXVgp074	G5R	EN1-like nuclease (Cop-G5R); G5R; similar to Vaccinia virus strain Copenhagen G5R	G5R	1305	10	N	1	0.999571	0.999875	0.42512
MPXVgp076	G7R	NLPc/P60 superfamily protein (Cop-G6R); G7R; similar to Vaccinia virus strain Copenhagen G6R	G6R	498	12	N	0.997845	0.99761	0.997788	1.05513
MPXVgp077	G8L	Virion phosphoprotein, early morphogenesis (Cop-G7L); G8L; similar to Vaccinia virus strain Copenhagen G7L; virion protein	G7L	1116	11		1	0.999545	0.999703	0.47401
MPXVgp078	G9R	VLTF-1 (late transcription factor 1) (Cop-G8R); G9R; similar to Vaccinia virus strain Copenhagen G8R; late gene transcription factor, VLTF-1	G8R	783	11	N	0.999968	0.999999	0.998903	0.29043
MPXVgp079	G10R	Entry/fusion complex component, myristylprotein (Cop-G9R); G10R; similar to Vaccinia virus strain Copenhagen G9R; myristylated protein	G9R	1023	13	N	0.159245	0.0603208	0.0700209	0.73579
MPXVgp080	M1R	IMV membrane protein (Cop-L1R); M1R; similar to Vaccinia virus strain Copenhagen L1R; myristylated IMV surface membrane protein	L1R	753	11	N	1	0.999999	0.999999	0.44905
MPXVgp082	M3L	Internal virion protein (Cop-L3L); M3L; similar to Vaccinia virus strain Copenhagen L3L	L3L	1035	11	N	1	0.999999	0.993623	0.40369
MPXVgp083	M4R	ss/dsDNA binding protein (VP8) (Cop-L4R); M4R; similar to Vaccinia virus strain Copenhagen L4R; virion core protein; ssDNA binding; stimulation of I8R helicase activity	L4R	755	12	N	1	0.989839	0.998795	0.29125
MPXVgp084	M5R	Entry and Fusion IMV protein (Cop-L5R); M5R;similar to Vaccinia virus strain Copenhagen L5R	L5R	387	7	N	1	0.932752	0.932867	1.475
MPXVgp085	L1R	Virion morph (Cop-J1R); L1R; similar to Vaccinia virus strain Copenhagen J1R	J1R	458	9	N	0.51217	0.582474	0.298526	0.31796
MPXVgp086	L2R	Thymidine kinase (Cop-J2R); L2R; similar to Vaccinia virus strain Copenhagen J2R; thymidine kinase	J2R	532	6	N	1	0.999998	0.97938	0.31076
MPXVgp087	L3R	Poly (A) polymerase small subunit (VP39) (Cop-J3R); L3R; similar to Vaccinia virus strain Copenhagen J3R;poly-A polymerase, stimulatory subunit, simultaneously cap-specific mRNA (nucleoside-O2'-)-methyltransferase	J3R	1002	14	N	0.0996098	0.12765	0.12554	0.4547
MPXVgp088	L4R	RNA polymerase subunit (RPO22) (Cop-J4R); L4R; similar to Vaccinia virus strain Copenhagen J4R; RNA polymerase, 22 kDa subunit	J4R	558	11	N	0.93733	0.717239	0.68268	0.12657
MPXVgp089	L5L	IMV membrane protein (Cop-J5L); L5L; similar to Vaccinia virus strain Copenhagen J5L; essential for virus multiplication	J5L	402	6	N	1	0.999763	0.999764	1.0248
MPXVgp090	L6R	RNA polymerase subunit (RPO147) (Cop-J6R); L6R;similar to Vaccinia virus strain Copenhagen J6R; RNA polymerase, 147 kDa subunit	J6R	3961	30	Y	0.00282951	0.0263382	0.00774953	0.22722
MPXVgp090#&	L6R	RNA polymerase subunit (RPO147) (Cop-J6R); L6R;similar to Vaccinia virus strain Copenhagen J6R; RNA polymerase, 147 kDa subunit	J6R	3961	29	N	0.220308	0.303754	0.0882247	0.16769
MPXVgp091	H1L	Tyr/Ser phosphatase, IFN-gamma inhibitor (Cop-H 1L); H1L; similar to Vaccinia virus strain Copenhagen H1L; tyrosine	H1L	516	12	N	0.917915	0.61995	0.609566	0.1451
MPXVgp092	H2R	IMV membrane protein (Cop-H2R); H2R; similar to Vaccinia virus strain Copenhagen H2R	H2R	570	9	N	0.999943	0.999966	0.99803	0.43391
MPXVgp093	H3L	IMV heparin binding surface protein (Cop-H3L); H3L; similar to Vaccinia virus strain Copenhagen H3L; IMV surface membrane protein	H3L	975	15	N	1	0.999993	0.999993	0.19756
MPXVgp094	H4L	RAP94 (RNA pol assoc protein) (Cop-H4L); H4L;similar to Vaccinia virus strain Copenhagen H4L; virion core RNA polymerase-associated protein, RAP94	H4L	1388	23	N	1	0.999754	0.99953	0.33609
MPXVgp095	H5R	VLTF-4 (late transcription factor 4) (Cop-H5R); H5R; similar to Vaccinia virus strain Copenhagen H5R; virosome-associated late gene transcription factor	H5R	633	8	N	1	0.994972	0.99749	0.91885
MPXVgp096	H6R	DNA topoisomerase type I (Cop-H6R); H6R; similar to Vaccinia virus strain Copenhagen H6R; DNA topoisomerase	H6R	944	10	N	1	0.999999	0.999985	0.59902
MPXVgp097	H7R	Viral membrane assembly proteins (VMAP) (Cop-H7R);H7R; similar to Vaccinia virus strain Copenhagen H7R	H7R	435	7	N	1	0.999902	0.999998	0.2136
MPXVgp098	E1R	mRNA capping enzyme large subunit (Cop-D1R); E1R; similar to Vaccinia virus strain Copenhagen D1R; mRNA capping enzyme, large subunit; RNA 5' triphosphatase and RNA guanylyl transferase activities	D1R	2538	24	N	0.0285206	0.0526861	0.0665033	0.30333
MPXVgp099	E2L	irion core (Cop-D2L); E2L; similar to Vaccinia virus strain Copenhagen D2L; virion core protein	D2L	441	7	N	1	0.999988	0.999989	0.06208
MPXVgp100	E3R	Virion core (Cop-D3R); E3R; similar to Vaccinia virus strain Copenhagen D3R; virion core protein	D3R	702	12	N	0.177544	0.299634	0.150446	0.19
MPXVgp101	E4R	Uracil-DNA glycosylase, DNA polymerase processivity factor (Cop-D4R); E4R; similar to Vaccinia virus strain Copenhagen D4R; uracil DNA glycosylase	D4R	657	8	N	1	0.999994	0.999994	0.19139
MPXVgp102	E5R	NTPase, DNA primase (Cop-D5R); E5R; similar to Vaccinia virus strain Copenhagen D5R; nucleic acid-independent nucleoside triphosphatase	D5R	2358	21	N	1	0.999986	0.998871	0.32614
MPXVgp103	E6R	Morphogenesis, VETF-s (early transcription factor small) (Cop-D6R); E6R; similar to Vaccinia virus strain Copenhagen D6R; early transcription factor, VETF, small subunit	D6R	1914	14	N	0.555539	0.303004	0.30139	0.79045
MPXVgp104	E7R	RNA polymerase subunit (RPO18) (Cop-D7R); E7R;similar to Vaccinia virus strain Copenhagen D7R; RNA polymerase, 18 kDa subunit	D7R	486	8	N	1	0.999999	0.99998	0.48292
MPXVgp105	E8L	Carbonic anhydrase, GAG-binding IMV membrane protein (Cop-D8L); E8L; similar to Vaccinia virus strain Copenhagen D8L; IMV surface membrane 32 kDa protein; binding to cell surface chondroitin sulfate; IMV adsorption to cell surface	D8L	915	13	N	1	0.999736	0.999825	0.5108
MPXVgp106	E9R	mRNA decapping enzyme (Cop-D9R); E9R; similar to Vaccinia virus strain Copenhagen D9R; Mut-like	D9R	642	5	N	1	0.999515	0.981739	0.79299
MPXVgp107	E10R	mRNA decapping enzyme (Cop-D10R); E10R; similar to vaccinia virus strain Copenhagen D10R; down regulation of gene expression; Mut-like	D10R	747	10	N	1	1	0.999954	0.13271
MPXVgp108	E11L	ATPase, NPH1 (Cop-D11L); E11L; similar to Vaccinia virus strain Copenhagen D11L; nucleoside triphosphate phosphohydrolase I, NPH I; DNA-dependent ATPase; early gene transcription termination factor	D11L	1896	11	N	0.509294	0.426739	0.418301	0.44938
MPXVgp109	E12L	mRNA capping enzyme small subunit (Cop-D12L); E12L, similar to Vaccinia virus strain Copenhagen D12L; mRNA capping enzyme, small subunit; mRNA	D12L	864	26	N	1	0.999826	0.999839	0.35281
MPXVgp110	E13L	Trimeric virion coat protein (rifampicin res)(Cop-D13L); E13L; similar to Vaccinia virus strain Copenhagen D13L; protein needed for the formation of immature IMV surface membrane	D13L	1656	7	N	1	0.999972	0.999886	0.13912
MPXVgp111	A1L	VLTF-2 (late transcription factor 2) (Cop-A1L);A1L; similar to Vaccinia virus strain Copenhagen A1L; late gene transcription factor, VLTF-2	A1L	453	5	N	0.885005	0.574972	0.563379	0.08878
MPXVgp112	A2L	LTF-3 (late transcription factor 3) (Cop-A2L); A2L; similar to Vaccinia virus strain Copenhagen A2L; late gene transcription factor, VLTF-3; zinc binding	A2L	675	8	N	1	1	0.998749	1.04029
MPXVgp114	A4L	P4b precursor (Cop-A3L); A4L; similar to Vaccinia virus strain Copenhagen A3L; major virion core protein p4b	A3L	1935	13	N	1	0.999389	0.999396	0.07854
MPXVgp115	A5L	39kDa virion core protein (Cop-A4L); A5L; similar to Vaccinia virus strain Copenhagen A4L; 39 kDa immunodominant virion core protein needed for the progression of IV to infectious IMV	A4L	846	12	N	0.291224	0.200638	0.513879	0.39944
MPXVgp116	A6R	rNA polymerase subunit (RPO19) (Cop-A5R); A6R; similar to Vaccinia virus strain Copenhagen A5R; precursor of RNA polymerase 22 kDa and 21 kDa	A5R	486	4	N	1	1	0.998965	0.39092
MPXVgp117	A7L	Viral membrane assembly proteins (VMAP), core protein (Cop-A6L); A7L; similar to Vaccinia virus strain Copenhagen A6L	A6L	1119	10	N	1	0.999842	0.999657	0.11558
MPXVgp118	A8L	VETF-L (early transcription factor large) (Cop-A7L); A8L; similar to Vaccinia virus strain Copenhagen A7L; early transcription factor, VETF, large subunit; needed for morphogenesis of the virion core	A7L	2133	14	N	1	0.999993	0.999884	0.29369
MPXVgp119	A9R	VITF-3 34kda subunit (Cop-A8R); A9R; similar to Vaccinia virus strain Copenhagen A8R; intermediate transcription factor, VITF-3, 34 kDa	A8R	879	10	N	1	0.999905	0.999948	0.08664
MPXVgp120	A10L	Viral membrane associated, early morphogenesis protein (Cop-A9L); A10L; similar to Vaccinia virus strain Copenhagen A9L	A9L	339	6	N	0.858405	1	0.517534	0.29891
MPXVgp121	A11L	P4a precursor (Cop-A10L); A11L; similar to Vaccinia virus strain Copenhagen A10L; major virion core protein p4a	A10L	2766	20	N	0.999999	0.999136	0.999381	0.20807
MPXVgp122	A12R	Viral membrane assembly proteins (VMAP) (Cop-A11R); A12R; similar to Vaccinia virus strain Copenhagen A11R	A11R	957	16	N	1	0.999775	0.999823	0.27671
MPXVgp123	A13L	Virion core and cleavage processing protein(Cop-A12L); A13L; similar to Vaccinia virus strain Copenhagen A12L; virion core protein	A12L	573	6	N	0.995921	0.922307	0.912736	0.0698
MPXVgp127	A17L	Myristylated protein, essential for entry/fusion(Cop-A16L); A17L; similar to Vaccinia virus strain Copenhagen A16L; soluble myristylated protein	A16L	1134	11	N	1	0.999496	0.99933	0.71822
MPXVgp128	A18L	IMV membrane protein (Cop-A17L); A18L; similar to Vaccinia virus strain Copenhagen A17L; IMV surface membrane protein; early function in virion morphgenesis	A17L	615	9	N	1	0.999955	0.999955	0.34873
MPXVgp129	A19R	DNA helicase, transcript release factor (Cop-A18R); A19R; similar to Vaccinia virus strain Copenhagen A18R; virion core associated DNA helicase; post-replicative negative transcription elongation factor	A18R	1479	20	N	1	0.999695	0.99987	0.37949
MPXVgp131	A21L	IMV membrane protein, entry/fusion complex component (Cop-A21L); A21L; similar to Vaccinia virus strain Copenhagen A21L	A21L	348	9	N	1	0.558597	0.558548	2.77927
MPXVgp132	A22R	DNA polymerase processivity factor (Cop-A20R);A22R; similar to Vaccinia virus strain Copenhagen A20R; processivity factor for the viral DNA polymerase, VPF	A20R	1281	12	N	1	0.999584	0.999829	0.28136
MPXVgp133	A23R	Holliday junction resolvase (Cop-A22R); A23R;similar to Vaccinia virus strain Copenhagen A22R	A22R	564	10	N	1	0.51523	0.523488	2.91103
MPXVgp134	A24R	VITF-3 45kda subunit (Cop-A23R); A24R; similar to Vaccinia virus strain Copenhagen A23R; intermediate transcription factor, VITF-3, 45 kDa	A23R	1149	9	N	1	0.959987	0.999973	0.2718
MPXVgp135	A25R	RNA polymerase subunit (RPO132) (Cop-A24R); A25R;similar to Vaccinia virus strain Copenhagen A24R; RNA polymerase, 132 kDa subunit	A24R	3495	19	N	0.12365	0.135835	0.103632	0.25272
MPXVgp138	A28L	P4c precursor (Cop-A26L); A28L; major component of IMV surface tubules; p4c	A26L	1536	48	N	3.919e-06	0.00331815	0.00116119	0.37838
MPXVgp139	A29L	IMV surface protein, fusion protein (Cop-A27L);A29L; similar to Vaccinia virus strain Copenhagen A27L; IMV surface membrane 14 kDa fusion protein; binding to cell surface heparan	A27L	333	6	N	1	1	0.993723	0.37545
MPXVgp140	A30L	IMV MP/Virus entry (Cop-A28L); A30L; similar to Vaccinia virus strain Copenhagen A28L	A28L	441	8	N	0.436733	0.270767	0.260389	0.71913
MPXVgp141	A31L	NA polymerase subunit (RPO35) (Cop-A29L); A31L;similar to Vaccinia virus strain Copenhagen A29L; RNA polymerase, 35 kDa subunit	A29L	918	15	N	1	0.999901	0.948243	0.6709
MPXVgp143	A33R	Hypothetical protein (Cop-A31R); A33R; similar to Vaccinia virus strain Copenhagen A31R	A31R	429	8	N	0.992094	0.886027	0.87687	0.47967
MPXVgp144	A34L	ATPase/DNA packaging protein (Cop-A32L); A34L; similar to Vaccinia virus strain Copenhagen A32L; DNA packaging into virion; NTP-binding motif A	A32L	813	9	N	0.220322	0.250921	0.183258	0.2626
MPXVgp145	A35R	EEV membrane phosphoglycoprotein, C-type lectin-like domain (Cop-A33R); A35R; similar to Vaccinia virus strain Copenhagen A33R; EEV envelope glycoprotein, needed for formation of actin-containing microvilli and cell-to-cell spread of virion; interacts with VAC A36R	A33R	546	12	N	1	0.999973	0.999881	0.3682
MPXVgp146	A36R	C-type lectin-like IEV/EEV glycoprotein (Cop-A3 4R); A36R; similar to Vaccinia virus strain Copenhagen A34R; EEV envelope glycoprotein, lectin-like; required for infectivity of EEV, formation of actin-containing microvilli, and cell-to-cell spread of virion	A34R	507	13	N	0.56441	0.449988	0.421745	0.52865
MPXVgp147	A37R	MHC class II antigen presentation inhibitor (Cop-A35R); A37R; similar to Vaccinia virus strain Copenhagen A35R	A35R	531	8	N	1	0.999957	0.999988	0.10689
MPXVgp148	A38R	IEV transmembrane phosphoprotein (Cop-A36R); A38R; similar to Vaccinia virus strain Copenhagen A36R; IEV but not CEV envelope protein; plays critical role for actin tail formation; interacts with VAC A33R and A34R	A36R	687	15	N	1	0.999879	0.999926	0.54069
MPXVgp149	A39R	Hypothetical protein (Cop-A37R); A39R; similar to Vaccinia virus strain Copenhagen A37R	A37R	807	19	N	1	0.999955	0.999801	0.22769
MPXVgp150	A40L	CD47-like, integral membrane protein (Cop-A38L);A40L; similar to Vaccinia virus strain Copenhagen A38L; integral membrane glycoprotein; immunoglobulin-like; regulation of the influx of extracellular Ca2+	A38L	834	8	N	1	0.999965	0.999996	0.20329
MPXVgp151	A41L	Chemokine binding protein (Cop-A41L); A41L; similar to Vaccinia virus strain Copenhagen A41L; secreted protein reducing infiltration of inflammatory cells into the infected area	A41L	666	8	N	1	0.999948	0.99991	0.43736
MPXVgp152	A42R	Profilin-like protein, ATI-localized (Cop-A42R); A42R; similar to Vaccinia virus strain Copenhagen A42R	A42R	402	7	N	1	0.965857	0.999997	0.19
MPXVgp153	A43R	Type I membrane glycoprotein (Cop-A43R); A43R; similar to Vaccinia virus strain Copenhagen A43R; membrane glycoprotein	A43R	591	9	N	0.324207	0.128152	0.12627	1.00091
MPXVgp156	A46R	Inactive Cu-Zn superoxide dismutase-like virion protein (Cop-A45R); A46R; similar to Vaccinia virus strainCopenhagen A45R; superoxide dismutase-like; virion core protein	A45R	378	9	N	1	0.559094	0.558548	2.77925
MPXVgp157	A47R	IL-1/TLR signaling inhibitor (Cop-A46R); A47R;similar to Vaccinia virus strain Copenhagen A46R	A46R	723	8	N	1	0.999994	0.999994	0.19139
MPXVgp158	A45L	3 beta-hydroxysteroid dehydrogenase/delta 5->4 isomerase (Cop-A44L); A45L; similar to Vaccinia virus strain Copenhagen A44L; 3-b-Hydroxy-delta5-steroid dehydrogenas	A44L	1041	18	N	0.917636	0.999852	0.99922	0.66281
MPXVgp159#	A49R	Thymidylate kinase (Cop-A48R); A49R; similar to Vaccinia virus strain Copenhagen A48R; thymidylate kinase	A48R	615	10	N	1	1	0.999996	0.67714
MPXVgp160	A50R	ATP-dependent DNA ligase (Cop-A50R); A50R; similar to Vaccinia virus strain Copenhagen A50R; DNA ligase	A50R	1680	22	N	1	0.999567	0.999614	0.40366
MPXVgp161	A51R	Hypothetical protein (Cop-A51R); A51R; similar to Vaccinia virus strain Copenhagen A51R	A51R	1005	8	N	1	0.999852	0.999874	0.37234
MPXVgp163	B2R	Hemagglutinin (Cop-A56R); B2R; similar to Vaccinia virus strain Copenhagen A56R; EEV envelope and cellmembrane glycoprotein hemagglutinin; inhibition of theability of infected cells to fuse; interacts with VAC F13L	A56R	942	25	N	0.402218	0.287871	0.550751	0.598
MPXVgp164	B3R	Ser/Thr Kinase (Cop-B1R); B3R; similar to Vaccinia virus strain Copenhagen B1R; serine	B1R	912	14	N	0.806404	0.999863	0.998491	0.09143
MPXVgp165	B4R	Schlafen (Cop-B2R); B4R; schlafen-like	B2R	1512	21	N	1	0.999644	0.999775	0.19042
MPXVgp166	B5R	Ankyrin (Cop-B4R); B5R; similar to Vaccinia virus strain Copenhagen B4R; ankyrin-like	B4R	1686	28	N	0.403075	0.441098	0.355898	0.50759
MPXVgp167	B6R	EEV type-1 membrane glycoprotein, protective antigen (Cop-B5R); B6R; similar to Vaccinia virus strain Copenhagen B5R; palmitated 42 kDa glycoprotein located both on the membranes of infected cells and on EEV envelope; complement control protein-like	B5R	953	17	N	1	0.999872	0.999993	0.2886
MPXVgp168	B7R	Ankyrin-like protein (Cop-B6R); B7R; similar to Vaccinia virus strain Copenhagen B6R	B6R	531	13	N	0.311166	0.112295	0.105349	1.15432
MPXVgp169	B8R	Virulence, ER resident (Cop-B7R); B8R; similar to Vaccinia virus strain Copenhagen B7R	B7R	549	9	N	1	0.999997	0.999997	0.34738
MPXVgp170	B9R	Soluble IFN-g receptor-like protein (Cop-B8R); B9R;similar to Vaccinia virus strain Copenhagen B8R; secreted IFN-g binding protein	B8R	804	16	N	3.3195e-05	0.000202133	0.000191605	0.52113
MPXVgp170#	B9R	Soluble IFN-g receptor-like protein (Cop-B8R); B9R;similar to Vaccinia virus strain Copenhagen B8R; secreted IFN-g binding protein	B8R	804	15	N	0.775465	0.600962	0.566236	0.6709
MPXVgp172	B11R	Ser/Thr Kinase (Cop-B12R); B11R; similar to Vaccinia virus strain Copenhagen B12R; protein kinase-like	B12R	849	18	N	1	0.999996	0.999999	0.57789
MPXVgp173	B12R	Serpin 1,2,3 (Cop-K2L); SPI-2; B12R; serine protease inhibitor-like, SPI-2; inhibition of the IL-1b converting enzyme; apoptosis inhibition	K2L	1035	17	N	0.764145	0.999998	0.999982	0.52271
MPXVgp174	B13R	Hypothetical protein (Cop-C16L); B13R; similar to Vaccinia virus strain Copenhagen B15R	B15R	450	8	N	1	1	0.998517	0.40071
MPXVgp175*	B14R	IL-1 beta receptor (Cop-B16R); B14R; similar to Vaccinia virus strain Copenhagen B16R; secreted IL-1b binding protein; inhibition of virus infection induced fever	B16R	492	9	N	<0.0000000001	<0.0000000001	<0.0000000001	0.88162
MPXVgp177	B16R	IFN-alpha/beta receptor glycoprotein (Cop-B19R); B16R; similar to Vaccinia virus strain Copenhagen B19R;cell surface antigen and secreted IFN-a	B19R	1056	24	N	1	0.999131	0.998627	0.41025
MPXVgp178	B17R	Ankyrin (Cop-B20R); B17R; ankyrin-like	B20R	2364	26	N	0.0391053	0.0175715	0.0736264	0.6559
MPXVgp180	B19R	Serpin 1,2,3 (Cop-K2L); SPI-1; B19R; serine protease inhibitor-like, SPI-1; apoptosis inhibition	K2L	1074	17	Y (Recom1.KC257459, MaP: KJ642614, MiP: UNKWON ), Supported by GBMCS	0.408827	0.362319	0.281091	0.52094
MPXVgp181#	B20R	Hypothetical protein (Cop-C14L); B20R	C14L	573	12	N	1	0.999949	0.999919	0.75933
MPXVgp182	B21R	Surface glycoprotein; B21R; putative membrane-associated glycoprotein; cadherin-like domain	N/A	5643	56	Y (Recom1.AY741551, MaP: ON929062, MiP: UNKWON ), Supported by GMCS	0	0.000736014	0.120844	1.77937	Recombination bias the result
MPXVgp182#&	B21R	Surface glycoprotein; B21R; putative membrane-associated glycoprotein; cadherin-like domain	N/A	5643	55	N	0.17506	0.253157	0.170338	1.77937
MPXVgp185	N1R	Hypothetical protein (Cop-C16L); N1R; similar to Vaccinia virus strain Copenhagen B22R; VAC B15R-like	B22	462	13	N	0.594029	0.665526	0.622776	0.33092
MPXVgp188	N4R	Ankyrin (CPXV-017); N4R; ankyrin-like	N/A	1314	15	N	0.120057	0.0383115	0.244556	0.74175
MPXVgp189	J1R	Ankyrin (Cop-C19L); J1R; ankyrin-like	C19L	1767	24	N	1	0.99917	0.999036	0.65072
MPXVgp190	J2R	TNF receptor (CrmB) (Cop-C22L); J2R; secreted TNF binding protein	C22L	1050	25	N	1	0.999485	0.996325	0.4378
MPXVgp191	J3R	Chemokine binding protein (Cop-C23L); J3R; similar to Vaccinia virus strain Copenhagen B29R; CC-chemokine binding	C23L	742	18	N	0.0176198	0.0269595	0.0427289	0.37267
^ Many premature terminations were found in this gene, and were not suitable for selection analysis. $ Only three alleles was found in this gene, not suitable for selection analysis.* Every site was identified as positive selection sites by ML methods, but none of which was supported by the FUBAR. # one allele with frameshift mutations was found in these genes and to prevent them from interfering…
